# Supplementary material for: Quantifying temperature-sliding inconsistency in thermomechanical coupling: a comparative analysis of geothermal heat flux datasets at Totten Glacier
Source: Copernicus journal article supplement (doi:10.5194/tc-20-835-2026), 2026-02-02
Supplement: Supplementary file 1 [file tc-20-835-2026-supplement.pdf]

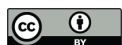

*Supplement of*

## **Quantifying temperature-sliding inconsistency in thermomechanical coupling: a comparative analysis of geothermal heat flux datasets at Totten Glacier**

**Junshun Wang et al.**

*Correspondence to:* Liyun Zhao (zhaoliyun@bnu.edu.cn) and John C. Moore (john.moore.bnu@gmail.com)

The copyright of individual parts of the supplement might differ from the article licence.

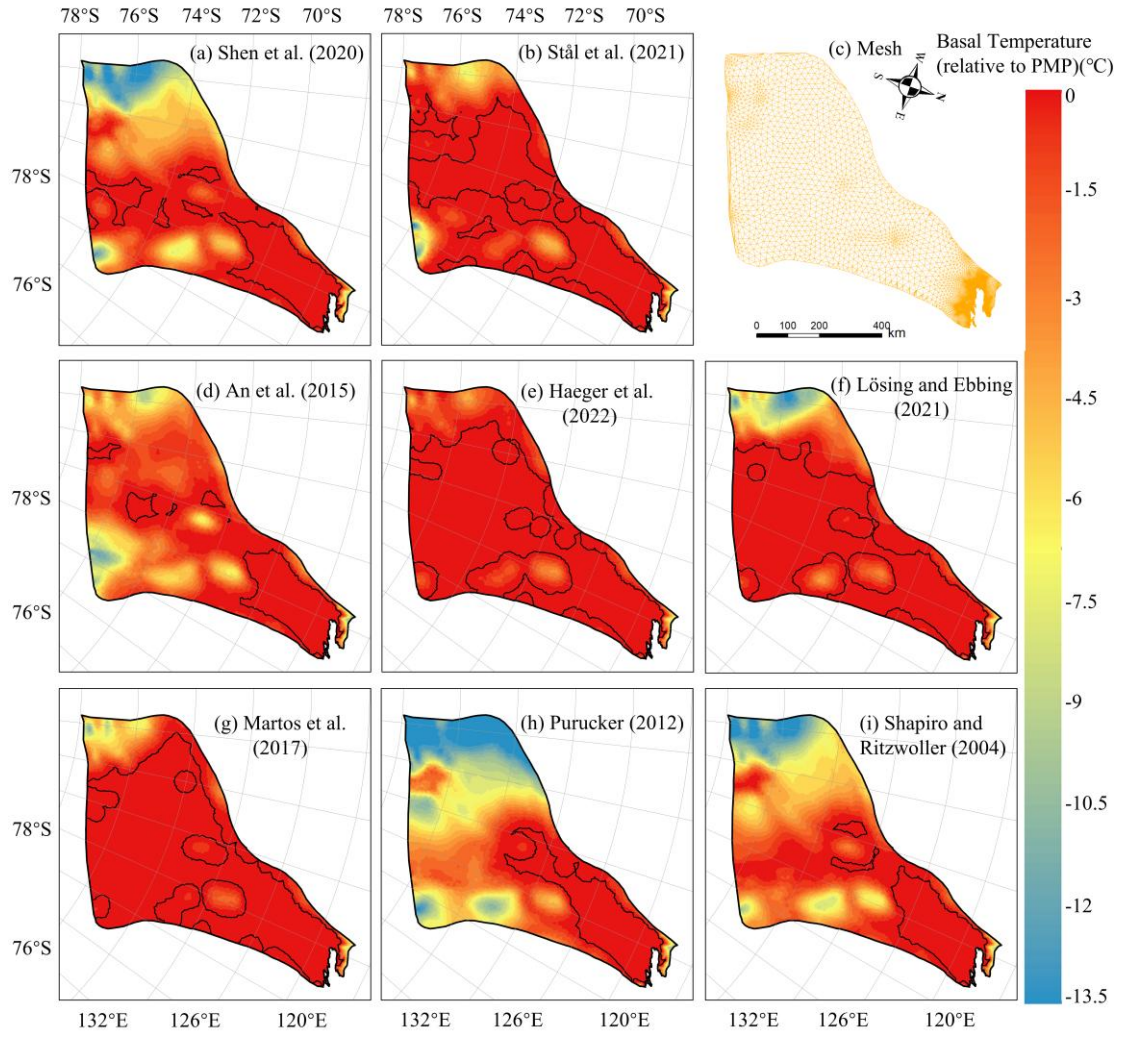

**Figure S1.** Modelled basal ice temperature (**a-b, d-i**) and the 2D mesh of the footprint (**c**) from Huang et al. (2024). The boundary of the basal ice at the pressure melting point is marked by a thin black contour. This figure is generated from the result in Huang et al. (2024) with permission. The abbreviation PMP stands for pressure melting point.

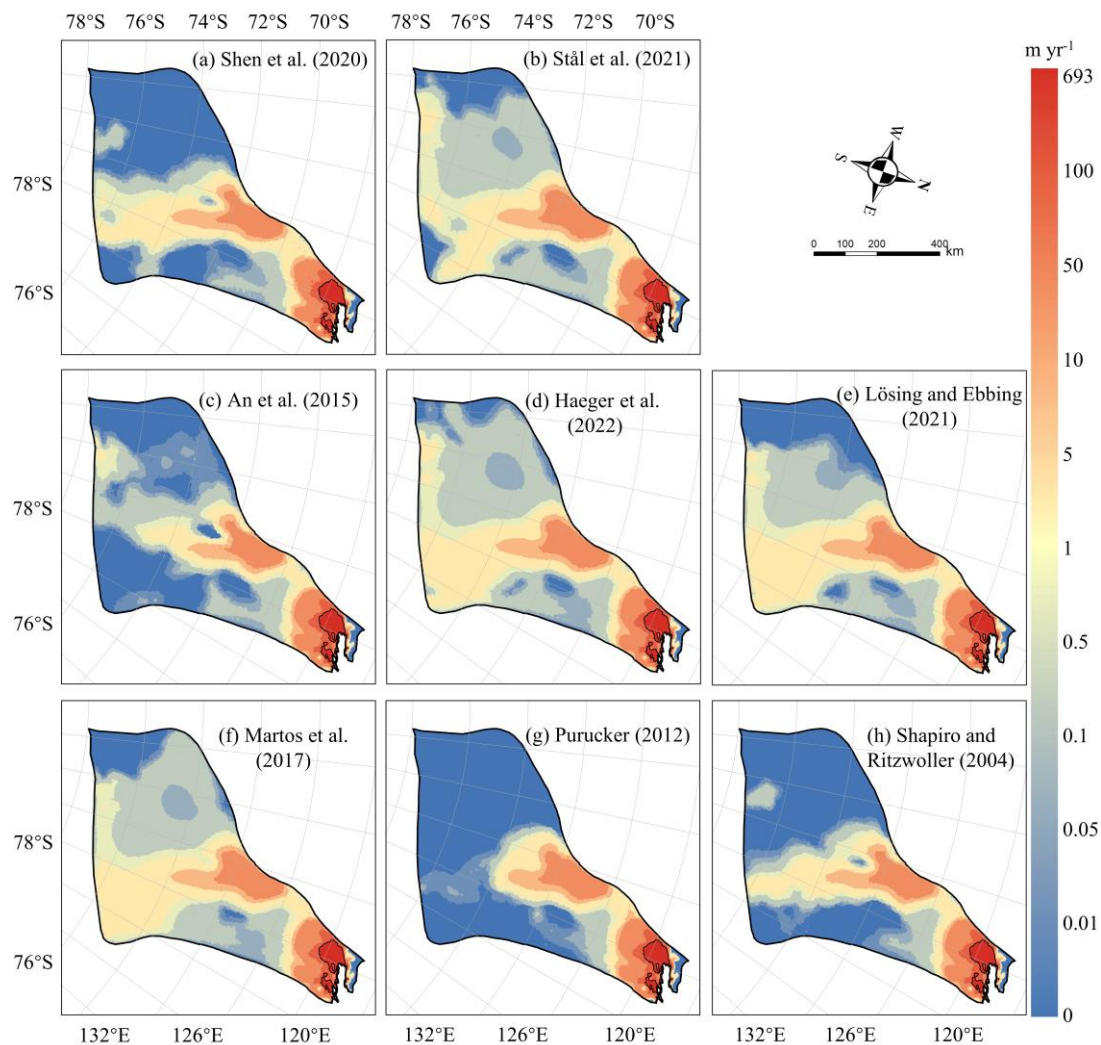

**Figure S2.** Modelled basal ice velocity (a-h) using the GHFs in Figure 2. Regions with the basal ice velocity faster than 100 m yr<sup>-1</sup> are outlined by a thin black contour. This figure is generated from the result in Huang et al. (2024) with permission.

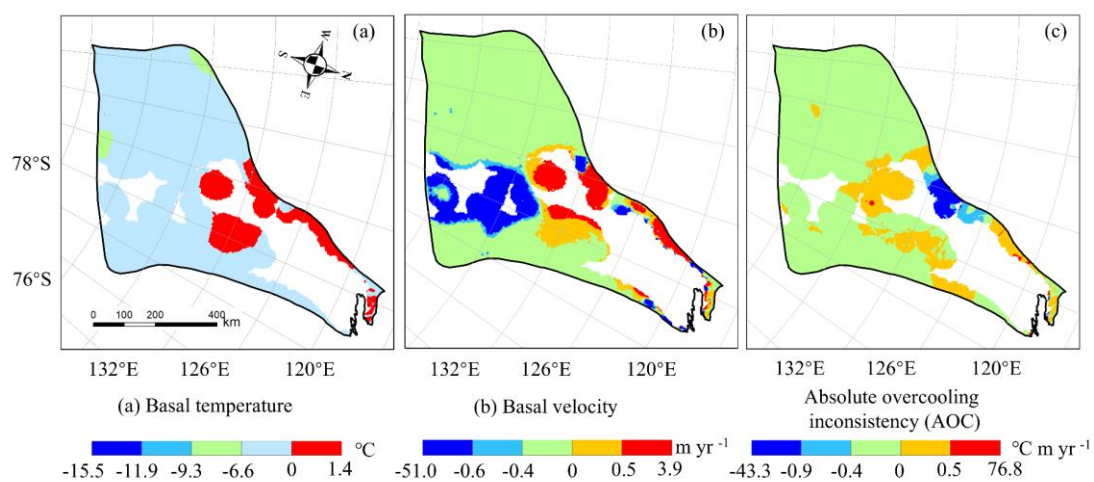

**Figure S3.** Difference in spatial distribution of (a) modelled basal temperature, (b)

modelled basal velocity and (c) absolute overcooling inconsistency (*AOC*) between employing Purucker et al. (2012) and Shen et al. (2020) GHFs. The colored region is the common cold-bed region identified by both simulation results utilizing Purucker et al. (2012) and Shen et al. (2020) GHFs.

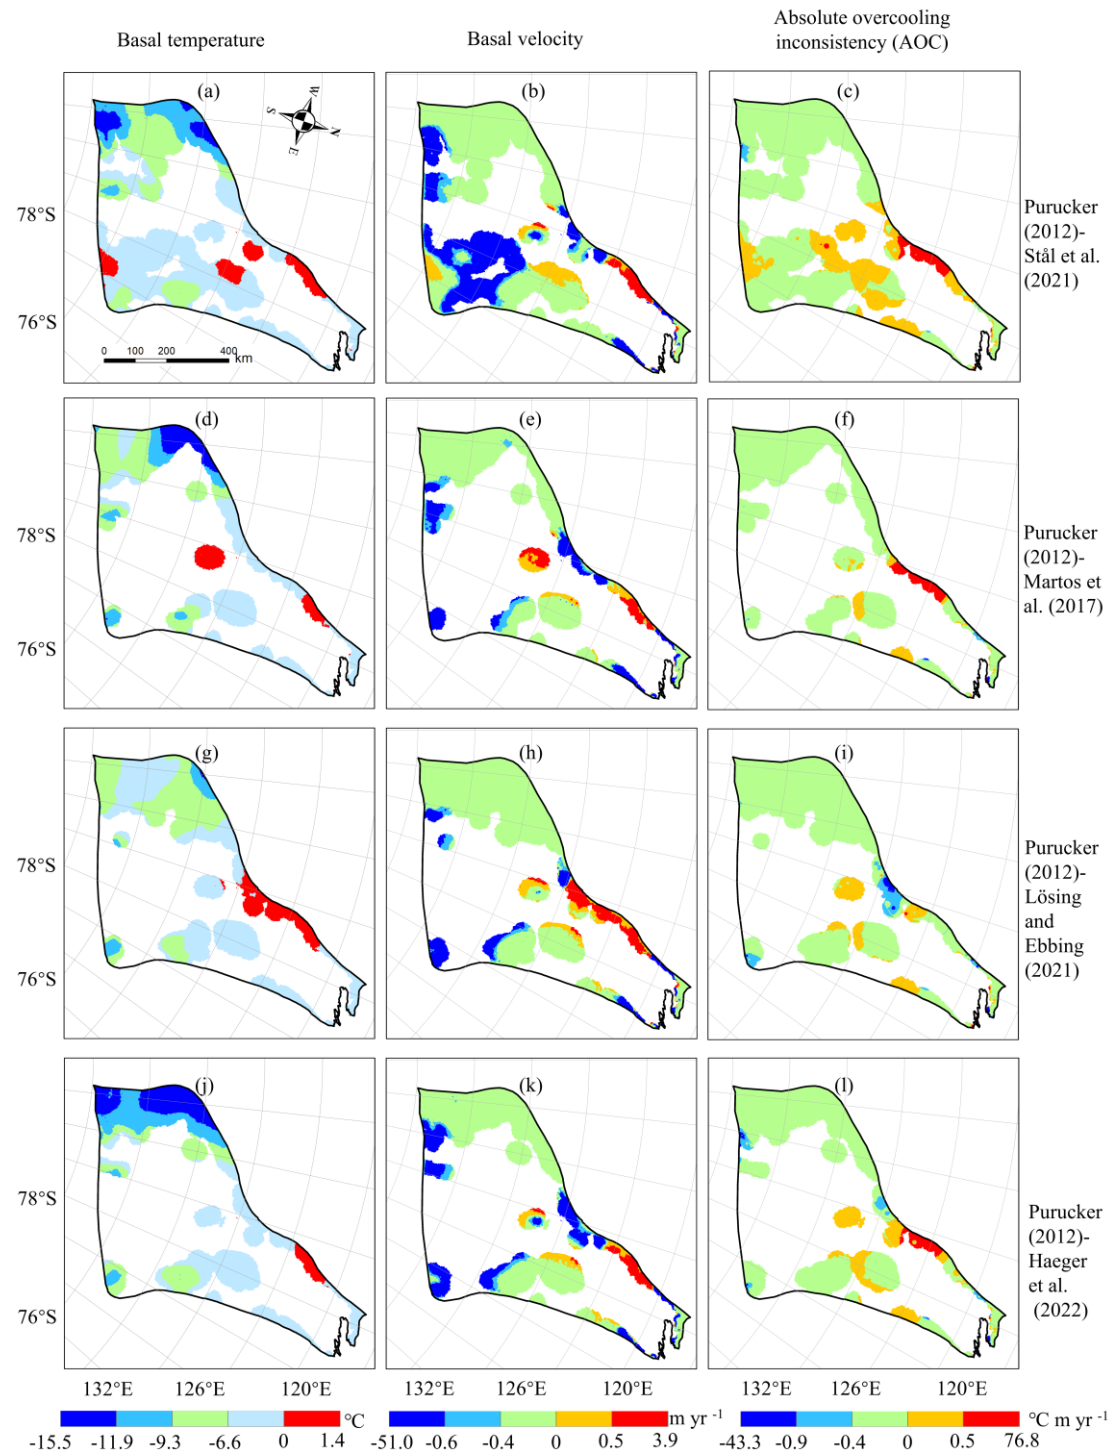

**Figure S4.** The spatial differences of modelled basal temperature, basal velocity, absolute overcooling inconsistency (*AOC*) (from left to right columns) between

utilizing Purucker et al. (2012) GHF and utilizing Stål et al. (2021), Martos et al. (2017), Lösing and Ebbing (2021) and Haeger et al. (2022) (as labeled for each row). The colored regions are the cold beds that they have in common with the simulation result using Purucker et al. (2012) GHF.

Table S1. Summary of input datasets used in ice sheet model.

| Input variables                                    | Datset name                                                | Reference                                                                                                                                                                                    |
|----------------------------------------------------|------------------------------------------------------------|----------------------------------------------------------------------------------------------------------------------------------------------------------------------------------------------|
| Surface ice velocity                               | MEaSURES InSAR-Based Antarctic Ice Velocity Map, version 2 | Morlighem et al. (2020)                                                                                                                                                                      |
| Surface elevation, bed elevation and ice thickness | MEaSURES BedMachine Antarctica, version 2                  | Rignot et al. (2017)                                                                                                                                                                         |
| Surface temperature                                | ALBMAP v1<br>Antarctic_T2m_reconstruction_2001-2018        | Le Brocq et al. (2010)<br>Zhang et al. (2022)                                                                                                                                                |
| GHF maps                                           | —                                                          | Shen et al. (2020)<br>Stål et al. (2021)<br>An et al. (2015)<br>Haeger et al. (2022)<br>Lösing and Ebbing (2021)<br>Martos et al. (2017)<br>Purucker (2012)<br>Shapiro and Ritzwoller (2004) |
| Specularity content                                | ICECAP basal interface specularity content                 | Dow et al. (2019)                                                                                                                                                                            |

## References

- An, M., Wiens, D. A., Zhao, Y., Feng, M., Nyblade, A., Kanao, M., Li, Y., Maggi, A., and L  v  que, J.: Temperature, lithosphere-asthenosphere boundary, and heat flux beneath the Antarctic Plate inferred from seismic velocities, *J. Geophys. Res. Solid Earth*, 120, 8720–8742, <https://doi.org/10.1002/2015JB011917>, 2015.
- Haeger, C., Petrunin, A. G., and Kaban, M. K.: Geothermal Heat Flow and Thermal Structure of the Antarctic Lithosphere, *Geochem. Geophys. Geosystems*, 23, e2022GC010501, <https://doi.org/10.1029/2022GC010501>, 2022.
- Huang, Y., Zhao, L., Wolovick, M., Ma, Y., and Moore, J. C.: Using specularity content to evaluate eight geothermal heat flow maps of Totten Glacier, *The Cryosphere*, 18, 103–119, <https://doi.org/10.5194/tc-18-103-2024>, 2024.
- L  sing, M. and Ebbing, J.: Predicting Geothermal Heat Flow in Antarctica With a Machine Learning Approach, *J. Geophys. Res. Solid Earth*, 126, e2020JB021499,

- <https://doi.org/10.1029/2020JB021499>, 2021.
- Martos, Y. M., Catalán, M., Jordan, T. A., Golynsky, A., Golynsky, D., Eagles, G., and Vaughan, D. G.: Heat Flux Distribution of Antarctica Unveiled, *Geophys. Res. Lett.*, 44, 11,417–11,426, <https://doi.org/10.1002/2017GL075609>, 2017.
- Purucker, M.: Geothermal heat flux data set based on low resolution observations collected by the CHAMP satellite between 2000 and 2010, and produced from the MF-6 model following the technique described in Fox Maule et al. (2005), Interactive System for Ice sheet Simulation [data set], [https://core2.gsfc.nasa.gov/research/purucker/heatflux\\_mf7\\_foxmaule05.txt](https://core2.gsfc.nasa.gov/research/purucker/heatflux_mf7_foxmaule05.txt) (last access: 24 December 2023), 2012.
- Shapiro, N.: Inferring surface heat flux distributions guided by a global seismic model: particular application to Antarctica, *Earth Planet. Sci. Lett.*, 223, 213–224, <https://doi.org/10.1016/j.epsl.2004.04.011>, 2004.
- Shen, W., Wiens, D. A., Lloyd, A. J., and Nyblade, A. A.: A Geothermal Heat Flux Map of Antarctica Empirically Constrained by Seismic Structure, *Geophys. Res. Lett.*, 47, e2020GL086955, <https://doi.org/10.1029/2020GL086955>, 2020.
- Stål, T., Reading, A. M., Halpin, J. A., and Whittaker, J. M.: Antarctic Geothermal Heat Flow Model: Aq1, *Geochem. Geophys. Geosystems*, 22, e2020GC009428, <https://doi.org/10.1029/2020GC009428>, 2021.
